# Supplementary material for: Detection of thyroid cancer among children and adolescents in Fukushima, Japan: a population-based cohort study of the Fukushima Health Management Survey
Source: PubMed Central journal article supplement — eClinicalMedicine. 2024 Aug 26;75:102722. doi: 10.1016/j.eclinm.2024.102722 (PMC11400584; doi:10.1016/j.eclinm.2024.102722), 2024-08-26
Supplement: mmc1.pdf [file mmc1.pdf]

**sTable 1.** Characteristics of explanatory variables of eligible people (Imputed Data)

| <b>Imputed Data<sup>a</sup> N=253346</b> |        |                                                      |                                      |                                 |                  |                        |  |
|------------------------------------------|--------|------------------------------------------------------|--------------------------------------|---------------------------------|------------------|------------------------|--|
|                                          | N      | Detected suspected thyroid cancer cases (DSTC cases) | Total person years (PY) <sup>b</sup> | DR <sup>c</sup> (per 100000 PY) | DRR <sup>d</sup> | DRR 95%CI <sup>e</sup> |  |
| ALL                                      | 253346 | 97                                                   | 939207.2                             | 10.328                          | —                | —                      |  |
| missing                                  | 0      | —                                                    | —                                    | —                               | —                | —                      |  |
| External radiation exposure mSv          |        |                                                      |                                      |                                 |                  |                        |  |
| [0,1) <sup>f</sup> (reference)           | 140153 | 49                                                   | 515253.7                             | 9.510                           | 1                | —                      |  |
| [1,2)                                    | 96195  | 40                                                   | 359329.8                             | 11.132                          | 1.173            | 0.773-1.781            |  |
| [2,3)                                    | 16470  | 8                                                    | 62509.1                              | 12.798                          | 1.343            | 0.636-2.836            |  |
| [3,4)                                    | 446    | 0                                                    | 1779.7                               | 0                               | —                | —                      |  |
| [4,5)                                    | 44     | 0                                                    | 174.5                                | 0                               | —                | —                      |  |
| [5,6)                                    | 22     | 0                                                    | 93.2                                 | 0                               | —                | —                      |  |
| [6,7)                                    | 5      | 0                                                    | 22.2                                 | 0                               | —                | —                      |  |
| [7,8)                                    | 5      | 0                                                    | 20.8                                 | 0                               | —                | —                      |  |
| [8,9)                                    | 6      | 0                                                    | 24.2                                 | 0                               | —                | —                      |  |
| [9,∞)                                    | 0      | 0                                                    | —                                    | —                               | —                | —                      |  |
| External radiation exposure mSv          |        |                                                      |                                      |                                 |                  |                        |  |
| <1 (reference)                           | 140153 | 49                                                   | 515253.7                             | 9.510                           | 1                | —                      |  |
| 1+                                       | 113193 | 48                                                   | 423953.4                             | 11.322                          | 1.193            | 0.801-1.776            |  |
| missing                                  | 0      | —                                                    | —                                    | —                               | —                | —                      |  |
| Sex                                      |        |                                                      |                                      |                                 |                  |                        |  |
| Boy (reference)                          | 127373 | 41                                                   | 471312.4                             | 8.699                           | 1                | —                      |  |
| Girl                                     | 125973 | 56                                                   | 467894.7                             | 11.969                          | 1.381            | 0.923-2.065            |  |
| missing                                  | 0      | 0                                                    | —                                    | —                               | —                | —                      |  |
| Age (years)                              |        |                                                      |                                      |                                 |                  |                        |  |
| [3,9)                                    | 62126  | 0                                                    | 246577.7                             | 0                               | 0                | —                      |  |
| [9,12) (reference)                       | 49500  | 10                                                   | 201164.8                             | 4.971                           | 1                | —                      |  |
| [12,15)                                  | 52849  | 24                                                   | 208325.8                             | 11.520                          | 2.320            | 1.110-4.850            |  |
| [15,18)                                  | 50091  | 31                                                   | 162664.8                             | 19.058                          | 3.834            | 1.880-7.820            |  |
| [18,25)                                  | 28456  | 30                                                   | 79000.9                              | 37.974                          | 8.764            | 4.280-17.900           |  |
| [25,∞)                                   | 1      | 0                                                    | 4.112                                | 0                               | 0                | —                      |  |
| missing                                  | 10323  | 2                                                    | —                                    | —                               | —                | —                      |  |
| Past medical history (PMH)               |        |                                                      |                                      |                                 |                  |                        |  |
| No (reference)                           | 219913 | 79                                                   | 814084.9                             | 9.704                           | 1                | —                      |  |
| Yes                                      | 33433  | 18                                                   | 125122.2                             | 14.386                          | 1.484            | 0.889-2.476            |  |
| missing                                  | 0      | —                                                    | —                                    | —                               | —                | —                      |  |
| Family history of thyroid cancer (FTC)   |        |                                                      |                                      |                                 |                  |                        |  |
| No (reference)                           | 233404 | 90                                                   | 864569                               | 10.410                          | 1                | —                      |  |
| Yes                                      | 19942  | 7                                                    | 74638.1                              | 9.379                           | 0.902            | 0.418-1.947            |  |
| missing                                  | 0      | —                                                    | —                                    | —                               | —                | —                      |  |
| Frequency of eating seafood (FESF)       |        |                                                      |                                      |                                 |                  |                        |  |
| 0 or 1-2/week (reference)                | 188666 | 73                                                   | 696322.5                             | 10.484                          | 1                | —                      |  |
| 3-5 or 6-7/week                          | 64680  | 24                                                   | 242884.7                             | 9.881                           | 0.938            | 0.592-1.488            |  |
| missing                                  | 0      | —                                                    | —                                    | —                               | —                | —                      |  |
| Frequency of eating seaweed (FESW)       |        |                                                      |                                      |                                 |                  |                        |  |

|                              |        |    |          |        |       |             |
|------------------------------|--------|----|----------|--------|-------|-------------|
| 0 or 1-2/week<br>(reference) | 201348 | 79 | 744322.6 | 10.614 | 1     |             |
| 3-5 or 6-7/week              | 51998  | 18 | 194884.5 | 9.236  | 0.867 | 0.52-1.446  |
| missing                      | 0      | —  | —        | —      | —     | —           |
| Six districts                |        |    |          |        |       |             |
| North (reference)            | 66729  | 29 | 252114.4 | 11.503 | 1     | —           |
| Central                      | 70545  | 23 | 253836   | 9.061  | 0.786 | 0.455-1.358 |
| South                        | 20328  | 5  | 72802.6  | 6.868  | 0.594 | 0.23-1.535  |
| Soso                         | 23103  | 12 | 94917.9  | 12.643 | 1.102 | 0.562-2.159 |
| Iwaki                        | 42948  | 19 | 167604.4 | 11.336 | 0.984 | 0.552-1.754 |
| Aizu + Minami<br>Aizu        | 29693  | 9  | 97931.8  | 9.190  | 0.793 | 0.376-1.676 |
| missing                      | 0      | —  | —        | —      | —     | —           |
| Overweight                   |        |    |          |        |       |             |
| No (reference)               | 200222 | 70 | 740582.5 | 9.452  | 1     | —           |
| Yes                          | 53124  | 27 | 198624.7 | 13.594 | 1.429 | 0.917-2.228 |
| missing                      | 0      | —  | —        | —      | —     | —           |

<sup>a</sup>Imputed Data: for cases in which missing external radiation-dose data were estimated by imputation,

<sup>b</sup>PY: person-years,

<sup>c</sup>DR: detection rate per 10<sup>5</sup> people,

<sup>d</sup>95%CI: 95% Confidence Interval,

<sup>e</sup>DRR : detection rate ratio,

<sup>f</sup>[a,b): the interval with greater than or equal to a and less than b
