# Supplementary material for: Detection of thyroid cancer among children and adolescents in Fukushima, Japan: a population-based cohort study of the Fukushima Health Management Survey
Source: PubMed Central journal article supplement — eClinicalMedicine. 2024 Aug 26;75:102722. doi: 10.1016/j.eclinm.2024.102722 (PMC11400584; doi:10.1016/j.eclinm.2024.102722), 2024-08-26
Supplement: mmc2.pdf [file mmc2.pdf]

**sTable 2. Poisson regressions (Imputed Data)**

| Imputed Data <sup>a</sup> N=253346      |             |                  |                      |       |              |
|-----------------------------------------|-------------|------------------|----------------------|-------|--------------|
| Model 1 <sup>b</sup>                    |             |                  | Model 2 <sup>c</sup> |       |              |
|                                         |             | DRR <sup>d</sup> | 95%CI <sup>e</sup>   | DRR   | 95%CI        |
| External radiation exposure (ERE): mSv  |             |                  |                      |       |              |
| <1                                      | reference   | 1                | —                    | 1     | —            |
| 1+                                      |             | 1.202            | 0.772-1.872          | 1.201 | 0.772-1.871  |
| Sex                                     |             |                  |                      |       |              |
| Boy                                     |             | 1                | —                    | 1     | —            |
| Girl                                    |             | 1.291            | 0.858-1.941          | 1.313 | 0.872-1.976  |
| Age category (years)                    |             |                  |                      |       |              |
| [3,9) <sup>f</sup>                      |             | —                | —                    | —     | —            |
| [9,12)                                  |             | 1                | —                    | 1     | —            |
| [12,15)                                 |             | 2.294            | 1.097-4.797          | 2.296 | 1.098-4.803  |
| [15,18)                                 |             | 3.893            | 1.908-7.945          | 3.897 | 1.909-7.953  |
| [18,25)                                 |             | 8.560            | 4.179-17.535         | 8.568 | 4.177-17.572 |
| Overweight                              |             |                  |                      |       |              |
| No                                      |             | 1                | —                    | 1     | —            |
| Yes                                     |             | 1.340            | 0.851-2.110          | 1.329 | 0.844-2.092  |
| Past medical history (PMH):             |             |                  |                      |       |              |
| No                                      |             | —                | —                    | 1     | —            |
| Yes                                     |             | —                | —                    | 1.434 | 0.846-2.431  |
| Family history of thyroid cancer (FTC): |             |                  |                      |       |              |
| No                                      |             | —                | —                    | 1     | —            |
| Yes                                     |             | —                | —                    | 0.830 | 0.383-1.798  |
| Frequency of eating seafood (FESF):     |             |                  |                      |       |              |
| 0                                       | or 1-2/week | —                | —                    | 1     | —            |
| 6-7                                     | or 3-4/week | —                | —                    | 1.119 | 0.681-1.841  |
| Frequency of eating seaweed (FESW):     |             |                  |                      |       |              |
| 0                                       | or 1-2/week | —                | —                    | 1     | —            |
| 6-7                                     | or 3-5/week | —                | —                    | 0.911 | 0.525-1.58   |
| Six districts                           |             |                  |                      |       |              |
| North                                   | (reference) | 1                | —                    | 1     | —            |
| Central                                 |             | 0.808            | 0.461-1.419          | 0.810 | 0.461-1.421  |
| South                                   |             | 0.666            | 0.254-1.744          | 0.667 | 0.255-1.748  |
| Soso                                    |             | 1.257            | 0.63-2.507           | 1.261 | 0.632-2.515  |
| Iwaki                                   |             | 0.980            | 0.532-1.805          | 0.976 | 0.53-1.799   |
| Aizu + Minami-Aizu                      |             | 0.914            | 0.407-2.053          | 0.924 | 0.411-2.078  |

<sup>a</sup>Imputed Data: for cases in which missing external radiation-dose data were estimated by imputation,

<sup>b</sup>Model 1: The explanatory variables were: ERE + Sex + Age + Six districts + Overweight.

<sup>c</sup>Model 2: The explanatory variables were: ERE + Sex + Age + Six districts + Overweight + PMH + FTC + FESF + FESW.

<sup>d</sup>DRR : detection rate ratio, <sup>e</sup>95%CI: 95% Confidence Interval, <sup>f</sup>[a,b): the interval with greater than or equal to a and less than b
